# Supplementary material for: The broad-spectrum antibiotic, zeamine, kills the nematode worm Caenorhabditis elegans
Source: PubMed Central journal article supplement (PMC4341552; doi:10.3389/fmicb.2015.00137), 2015-02-26
Supplement: presentation_1.pdf [file presentation_1.pdf]

## *Supplementary Material*

# **The broad-spectrum antibiotic, zeamine, kills the nematode worm *Caenorhabditis elegans***

**Josephine E. E. U. Hellberg<sup>1</sup>, Miguel A. Matilla<sup>1,2\*</sup>, George P. C. Salmond<sup>1\*</sup>**

<sup>1</sup>Department of Biochemistry, University of Cambridge, Cambridge, UK.

<sup>2</sup>Department of Environmental Protection, Estación Experimental del Zaidín – Consejo Superior de Investigaciones Científicas, Granada, Spain.

**\* Correspondence:**

Professor George P. C. Salmond, Department of Biochemistry, University of Cambridge, Tennis Court Road, Cambridge CB2 1QW, UK.

e-mail: [gpcs2@cam.ac.uk](mailto:gpcs2@cam.ac.uk);

Dr. Miguel A. Matilla, Department of Environmental Protection, Estación Experimental del Zaidín – Consejo Superior de Investigaciones Científicas, Profesor Albareda 1, Granada 18008, Spain.

e-mail: [miguel.matilla@eez.csic.es](mailto:miguel.matilla@eez.csic.es)

## **1. Supplementary Figures and Tables**

### **1.1. Supplementary tables**

**Table S1. Predicted functions of open reading frames in the *S. plymuthica* A153 *zmn* biosynthetic gene cluster.**

| Protein | Size (aa) | Proposed function (domain(s)) <sup>a</sup> | Sequence similarity (protein, origin)                                | Identity/<br>Similarity (%) | GenBank™<br>accession no. |
|---------|-----------|--------------------------------------------|----------------------------------------------------------------------|-----------------------------|---------------------------|
| Zmn1    | 141       | Hypothetical protein                       |                                                                      |                             |                           |
| Zmn2    | 170       | Hypothetical protein                       |                                                                      |                             |                           |
| Zmn3    | 457       | Pyridoxal-dependent decarboxylase          | WP_014808925, <i>Desulfomonile tiedjei</i>                           | 97/98                       | WP_014808925              |
| Zmn4    | 217       | Putative N-acyltransferase                 | WP_011612911, <i>Trichodesmium erythraeum</i>                        | 25/45                       | WP_011612911              |
| Zmn5    | 242       | 4'-phosphopantetheinyl transferase         | EntD, <i>Enterobacter</i> sp. DC3                                    | 48/63                       | AZXZ01000033.1            |
| Zmn6    | 306       | HlyD family secretion protein              | HlyD, <i>Asticcacaulis</i> sp. AC406                                 | 37/58                       | WP_031237376              |
| Zmn7    | 239       | ABC transporter, ATPase component          | SalX, <i>Dickeya zea</i>                                             | 69/78                       | WP_016943529              |
| Zmn8    | 367       | ABC transporter membrane protein           | DevC, <i>Dickeya solani</i>                                          | 71/83                       | WP_022632847              |
| Zmn9    | 331       | Putative permease                          | CDL85995, <i>Xenorhabdus cabanillasii</i> JM26                       | 42/61                       | CDL85995                  |
| Zmn10   | 2264      | PKS (KS-AT-ACP-KR-DH)                      | PfaA, <i>Photorhabdus temperata</i> subsp. <i>khanii</i> NC19        | 66/75                       | ETS29777                  |
| Zmn11   | 1436      | PKS (KS-KS-DH)                             | WP_012777102, <i>Photorhabdus asymbiotica</i>                        | 69/81                       | WP_012777102              |
| Zmn12   | 1017      | PfaD-family protein (NMO-AMT)              | KER04067, <i>Photorhabdus temperata</i> subsp. <i>temperata</i> Meg1 | 79/86                       | KER04067                  |
| Zmn13   | 255       | 3-oxoacyl-ACP reductase (KR)               | WP_012989343, <i>Xenorhabdus bovienii</i>                            | 74/85                       | WP_012989343              |
| Zmn14   | 412       | Thioester reductase (TR)                   | HetM, <i>Dickeya solani</i>                                          | 67/80                       | WP_022632853              |
| Zmn15   | 259       | Carbon-nitrogen hydrolase                  | CDH00688, <i>Xenorhabdus bovienii</i> str. <i>feltiae</i> Moldova    | 66/80                       | CDH00688                  |
| Zmn16   | 4169      | NRPS (A-T-C-A-T-C-A-T-C-C-A-T)             | CDL85988, <i>Xenorhabdus cabanillasii</i> JM26                       | 53/66                       | CDL85988                  |
| Zmn17   | 2180      | NRPS (C-A-T-C-A-T)                         | CDL85987, <i>Xenorhabdus cabanillasii</i> JM26                       | 61/72                       | CDL85987                  |
| Zmn18   | 1531      | PKS (KS-AT-KR-ACP)                         | CDL85171, <i>Xenorhabdus szentirmaii</i> DSM 16338                   | 57/69                       | CDL85171                  |
| Zmn19   | 512       | Condensation domain-containing protein     | CDL85985, <i>Xenorhabdus cabanillasii</i> JM26                       | 50/66                       | CDL85985                  |
| Zmn20   | 314       | ABC transporter, ATP-binding cassette      | WP_022632859, <i>Dickeya solani</i>                                  | 72/87                       | WP_022632859              |
| Zmn21   | 371       | ABC transporter, permease component        | CDH18908, <i>Xenorhabdus bovienii</i> str. <i>kraussei</i> Quebec    | 70/84                       | CDH18908                  |
| Zmn22   | 365       | Hydrolase family protein                   | WP_022632861, <i>Dickeya solani</i>                                  | 56/72                       | WP_022632861              |

<sup>a</sup> The following abbreviations are used: A, adenylation domain; ABC, ATP-binding cassette; ACP, acyl carrier protein domain; AMT, aminotransferase domain; AT, acyl transferase domain; C, condensation domain; DH, dehydratase domain; KR, ketoreductase domain; KS, ketosynthase domain; NMO, nitropropane monooxygenase domain; T, **thiolation** domain; TR, thioester reductase domain.

**Table S2. Table of bacterial species and strains that contain the *zmn* gene cluster.**

| Strain                            | Origin (country)                                                 | Reference                  |
|-----------------------------------|------------------------------------------------------------------|----------------------------|
| <b><i>Serratia plymuthica</i></b> |                                                                  |                            |
| A153                              | Isolated from rhizosphere of winter wheat (Sweden)               | Åström & Gerhardson (1988) |
| A30                               | Isolated from rotting potato tissue (Netherlands)                | Czajowski et al. (2012)    |
| AS9                               | Isolated from rapeseed roots (Sweden)                            | Neupane et al. (2012a)     |
| AS12                              | Isolated from rapeseed roots (Sweden)                            | Neupane et al. (2012b)     |
| AS13                              | Isolated from rapeseed roots (Sweden)                            | Neupane et al. (2012c)     |
| RVH1                              | Isolated from a raw vegetable processing line (not specified)    | Van Houdt et al. (2004)    |
| S13                               | Isolated from oil pumpkin anthosphere (Austria)                  | Fürnkranz et al. (2012)    |
| V4                                | Isolated from a milk processing plant (Portugal)                 | Cleto et al. (2012)        |
| <b><i>Dickeya</i> spp.</b>        |                                                                  |                            |
| MK7                               | Isolated from river water (United Kingdom)                       | Pritchard et al. (2013b)   |
| NCPFB 3274                        | Isolated from Chinese evergreen ( <i>Aglaonema</i> ) (St. Lucia) | Pritchard et al. (2013b)   |
| <b><i>Dickeya solani</i></b>      |                                                                  |                            |
| GBBC 2040                         | Not specified                                                    | Pritchard et al. (2013a)   |
| MK10                              | Isolated from potato (Israel)                                    | Pritchard et al. (2013a)   |
| MK16                              | Isolated from river water (United Kingdom)                       | Pritchard et al. (2013a)   |
| IPO 2222                          | Isolated from potato (Netherlands)                               | Pritchard et al. (2013a)   |
| <b><i>Dickeya zeae</i></b>        |                                                                  |                            |
| EC1                               | Isolated from rice (China)                                       | Hussain et al. (2008)      |
| DZ2Q                              | Isolated from rice (Italy)                                       | Bertani et al. (2013)      |
| ZJU1202                           | Isolated from diseased rice (China)                              | Li et al. (2012)           |

**Table S3. Comparison of *zmn* gene clusters in strains of *S. plymuthica* and *Dickeya* spp.**

| Strain                            | Length of cluster (kb) | Sequence identity with A153 (%) | Sequence identity with MK10 (%) |
|-----------------------------------|------------------------|---------------------------------|---------------------------------|
| <b><i>Serratia plymuthica</i></b> |                        |                                 |                                 |
| A153                              | 54.02                  | -                               | 61.2                            |
| AS9                               | 53.50                  | 95.1                            | 61.6                            |
| AS12                              | 53.61                  | 95.3                            | 60.2                            |
| AS13                              | 53.61                  | 95.3                            | 60.2                            |
| RVH1                              | 53.85                  | 96.4                            | 61.0                            |
| S13                               | 53.92                  | 96.3                            | 58.2                            |
| V4                                | 53.68                  | 95.9                            | 61.5                            |
| <b><i>Dickeya</i> spp.</b>        |                        |                                 |                                 |
| MK7                               | 51.01                  | 60.4                            | 100.0                           |
| NCP PB 3274                       | 51.06                  | 60.2                            | 96.6                            |
| <b><i>Dickeya solani</i></b>      |                        |                                 |                                 |
| GBBC 2040                         | 51.25                  | 60.3                            | 92.5                            |
| MK10                              | 50.64                  | 59.7                            | -                               |
| MK16                              | 50.65                  | 59.8                            | 92.0                            |
| IPO 2222                          | 51.26                  | 60.3                            | 92.5                            |

**Table S4. Zeamine activity ( $Z_A$ ) of culture supernatants from strain A153A, grown in minimal medium supplemented with different carbon sources (15mM).**

| Carbon source | $Z_A$ $OD_{600}^{-1a}$ | $Z_A$ category <sup>b</sup> |
|---------------|------------------------|-----------------------------|
| Arabinose     | 0.14                   | High                        |
| Citrate       | 0.00                   | None                        |
| Fructose      | 0.16                   | High                        |
| Galactose     | 0.02                   | Low                         |
| Gluconic acid | 0.00                   | None                        |
| Glucose       | 0.03                   | Low                         |
| Glycerol      | 0.00                   | None                        |
| Lactose       | 0.02                   | Low                         |
| Maltose       | 0.08                   | Medium                      |
| Mannitol      | 0.11                   | Medium                      |
| Mannose       | 0.08                   | Medium                      |
| Sorbitol      | 0.14                   | High                        |
| Succinic acid | 0.19                   | High                        |
| Sucrose       | 0.01                   | Low                         |
| Xylose        | 0.07                   | Medium                      |

<sup>a</sup> To calculate this metric, the  $Z_A$  of culture supernatants grown for 72 hours was divided with the maximum  $OD_{600}$  observed in medium supplemented with the relevant carbon source.

<sup>b</sup>  $Z_A$  categories were delineated as follows: none ( $Z_A$ : 0.00); low ( $Z_A$ : 0.01-0.05); medium ( $Z_A$ : 0.05-0.12); high ( $Z_A$ : 0.12 and above)

## 1.2. Supplementary figures

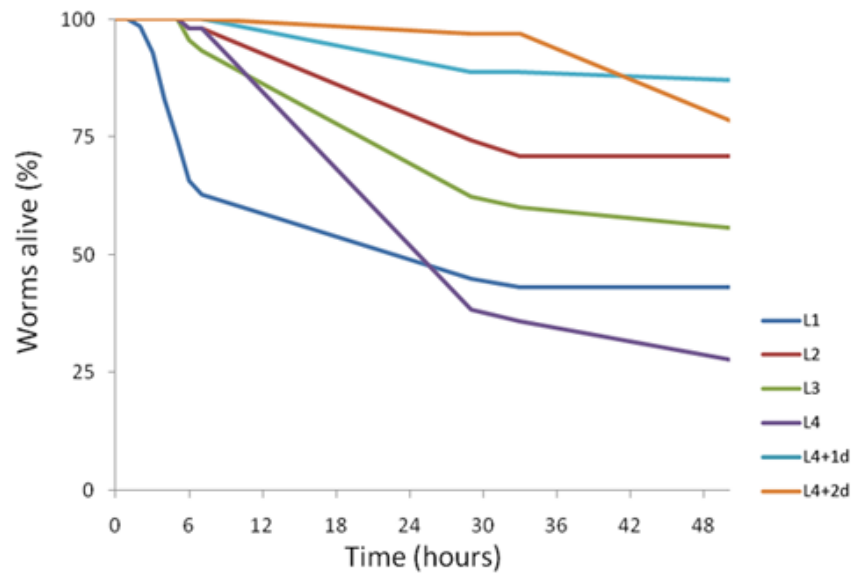

**Figure S1. Mutation of the *zmn* gene cluster attenuates *C. elegans* age-dependent sensitivity to the A153 nematocidal agent.** Survival of different larval stages and adult *Caenorhabditis elegans* worms when cultured on *S. plymuthica* A153JH6. The results of a representative trial with at least 50 worms under each condition is shown.

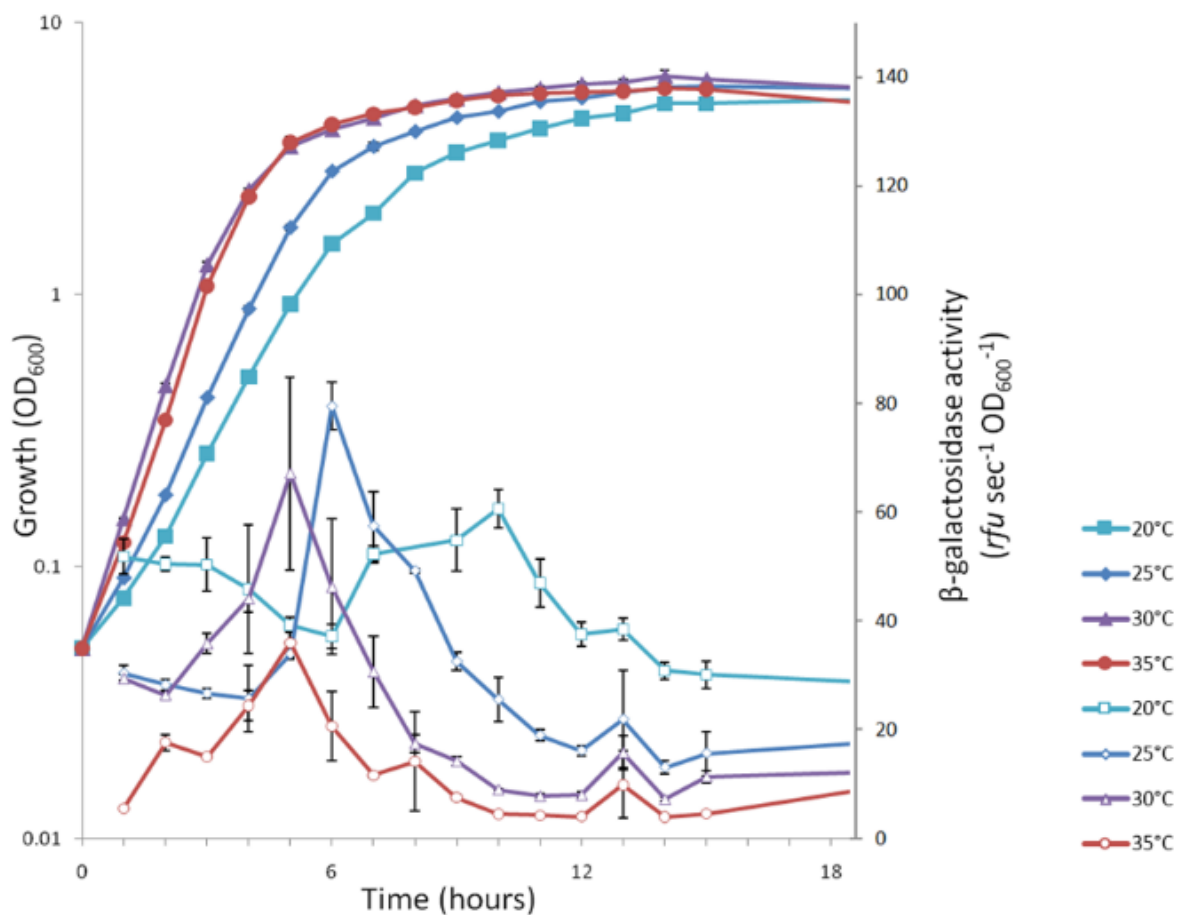

**Figure S2. The expression of the *S. plymuthica* A153 *zmn* gene cluster is not temperature-dependent.** Transcription of the *zmn* gene cluster in *Serratia plymuthica* A153 throughout growth at different temperatures. Data shown are the average values  $\pm$  SD of at least three experiments.

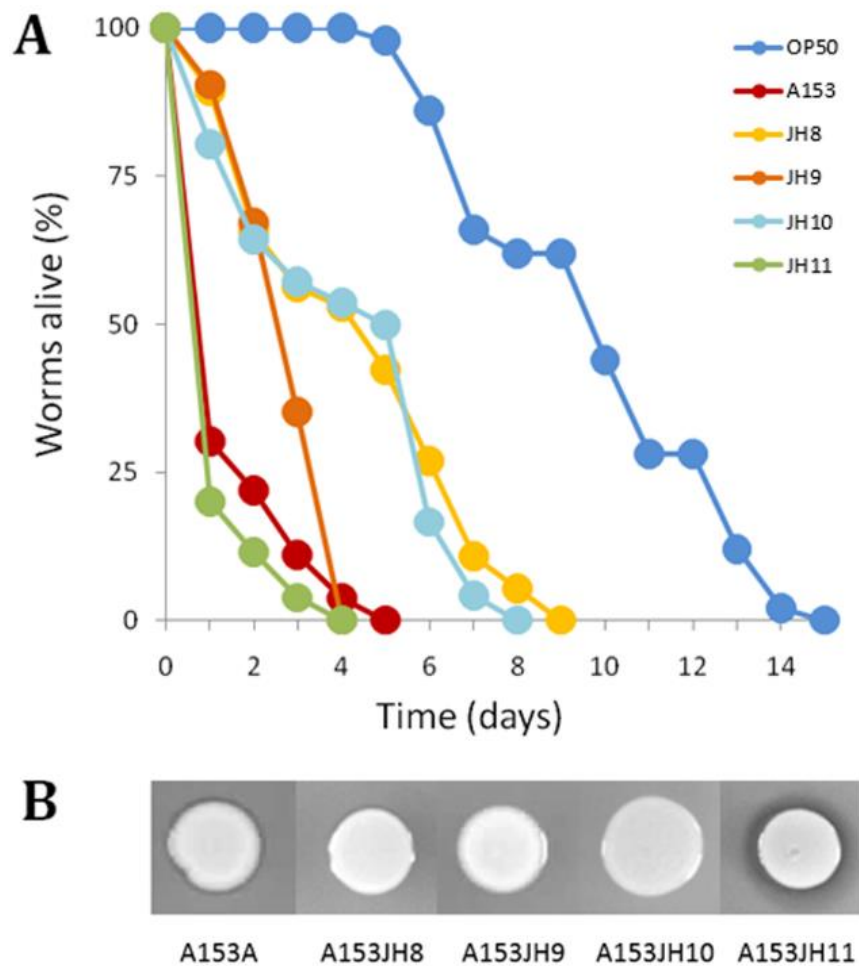

**Figure S3. Kinetics of the nematocidal properties of *Serratia plymuthica* A153 strains.** (A) Compared with the A153A parent strain, mutants A153JH8, A153JH9, and A153JH10, show reduced virulence against *C. elegans* ( $P \ll 0.05$ ). In contrast, mutant A153JH11 shows increased zeamine production although this does not result in significantly increased virulence in *C. elegans* ( $P = 0.12$ ). (B) Antibacterial phenotypes of the parent and mutant strains after an overnight incubation at 25°C.



### 1.3. Supplementary references

- Bertani, I., da Silva, D. P., Abbruscato, P., Piffanelli, P., and Venturi, V. (2013). Draft genome sequence of the plant pathogen *Dickeya zea* DZ2Q, isolated from rice in Italy. *Genome Announc.* 1, e00905-e00913. doi:10.1128/genomeA.00905-13
- Cleto, S., Matos, S., Kluskens, L., and Vieira, M. J. (2012). Characterization of contaminants from a sanitized milk processing plant. *PLOS ONE*, 7: e40189. doi:10.1371/journal.pone.0040189
- Hussain, M. B., Zhang, H. B., Xu, J. L., Liu, Q., Jiang, Z., and Zhang, L. H. (2008). The acyl-homoserine lactone-type quorum-sensing system modulates cell motility and virulence of *Erwinia chrysanthemi* pv. *zea*. *J. Bacteriol.* 190, 1045-1053.
- Li, B., Shi, Y., Ibrahim, M., Liu, H., Shan, C., Wang, Y., *et al.* (2012). Genome sequence of the rice pathogen *Dickeya zea* strain ZJU1202. *J. Bacteriol.* 194, 4452-4453.
- Van Houdt, R., Aertsen, A., Jansen, A., Quintana, A. L., and Michiels, C. W. (2004). Biofilm formation and cell-to-cell signalling in Gram-negative bacteria isolated from a food processing environment. *J. Appl. Microbiol.* 96, 177-184.
